# Supplementary material for: Balanced Trade-Offs between Alternative Strategies Shape the Response of C. elegans Reproduction to Chronic Heat Stress
Source: PLOS journal article supplement (doi:10.1371/journal.pone.0105513), 2014-08-28
Supplement: S3 (10.1371/journal.pone.0105513.s003) [file journal.pone.0105513.s003.pdf › journal.pone.0105513.s003.pdf]

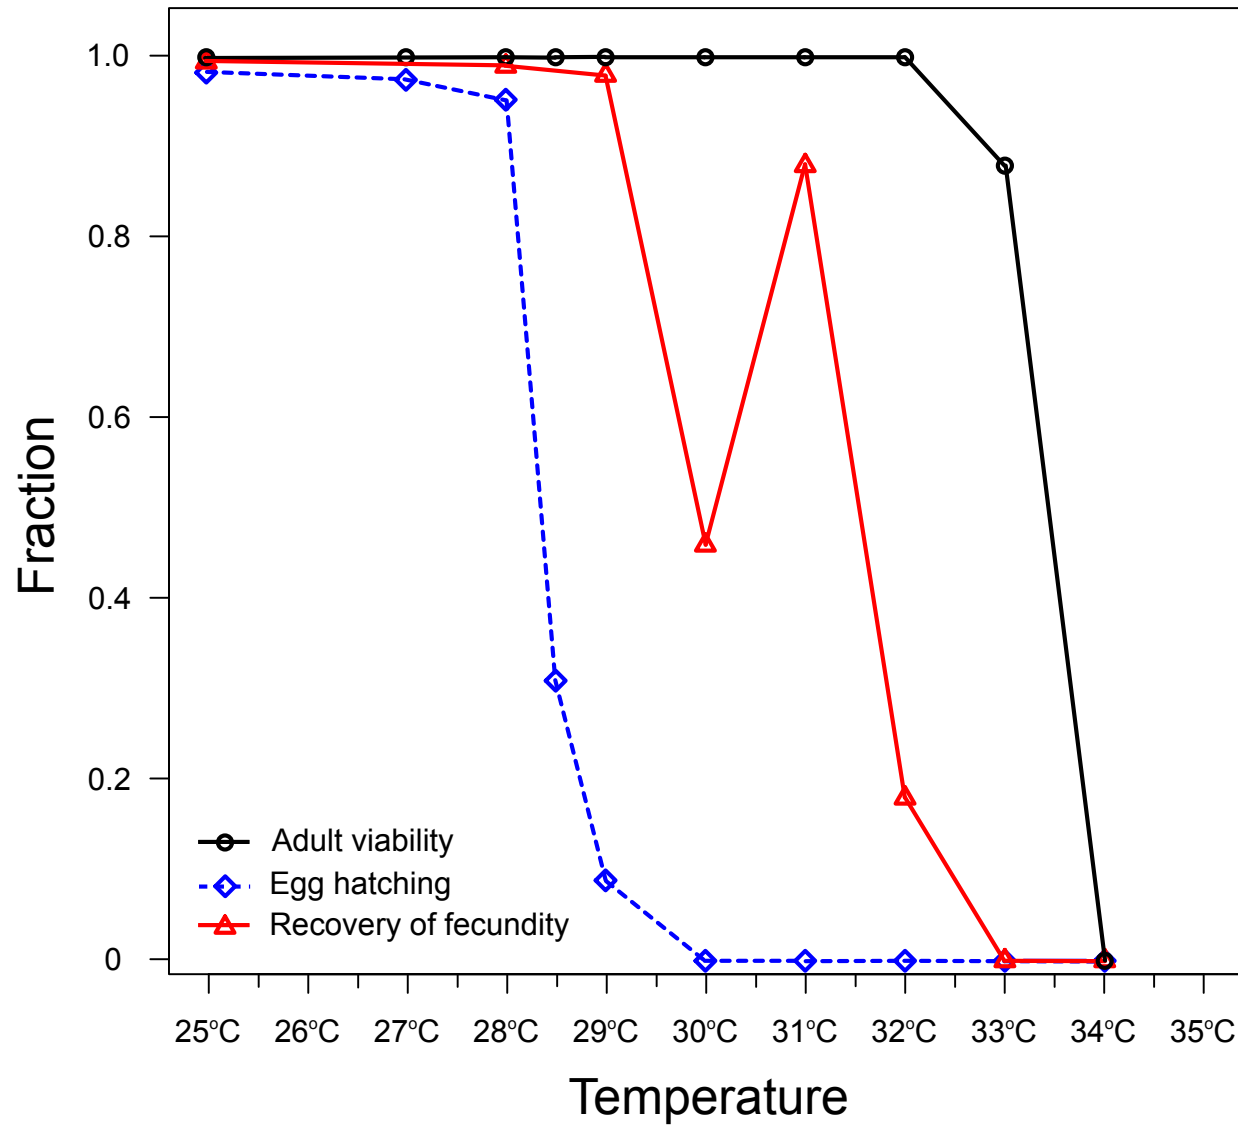

**Figure S3. Reproduction across a range of chronic stress temperatures (18 hours of heat stress).** Experiments were performed exactly as described in Figure 2, except the duration of the heat stress was 18, not 24 hours.
