# Supplementary material for: Balanced Trade-Offs between Alternative Strategies Shape the Response of C. elegans Reproduction to Chronic Heat Stress
Source: PLOS journal article supplement (doi:10.1371/journal.pone.0105513), 2014-08-28
Supplement: S4 (10.1371/journal.pone.0105513.s004) [file journal.pone.0105513.s004.pdf › journal.pone.0105513.s004.pdf]

## 20°C Census

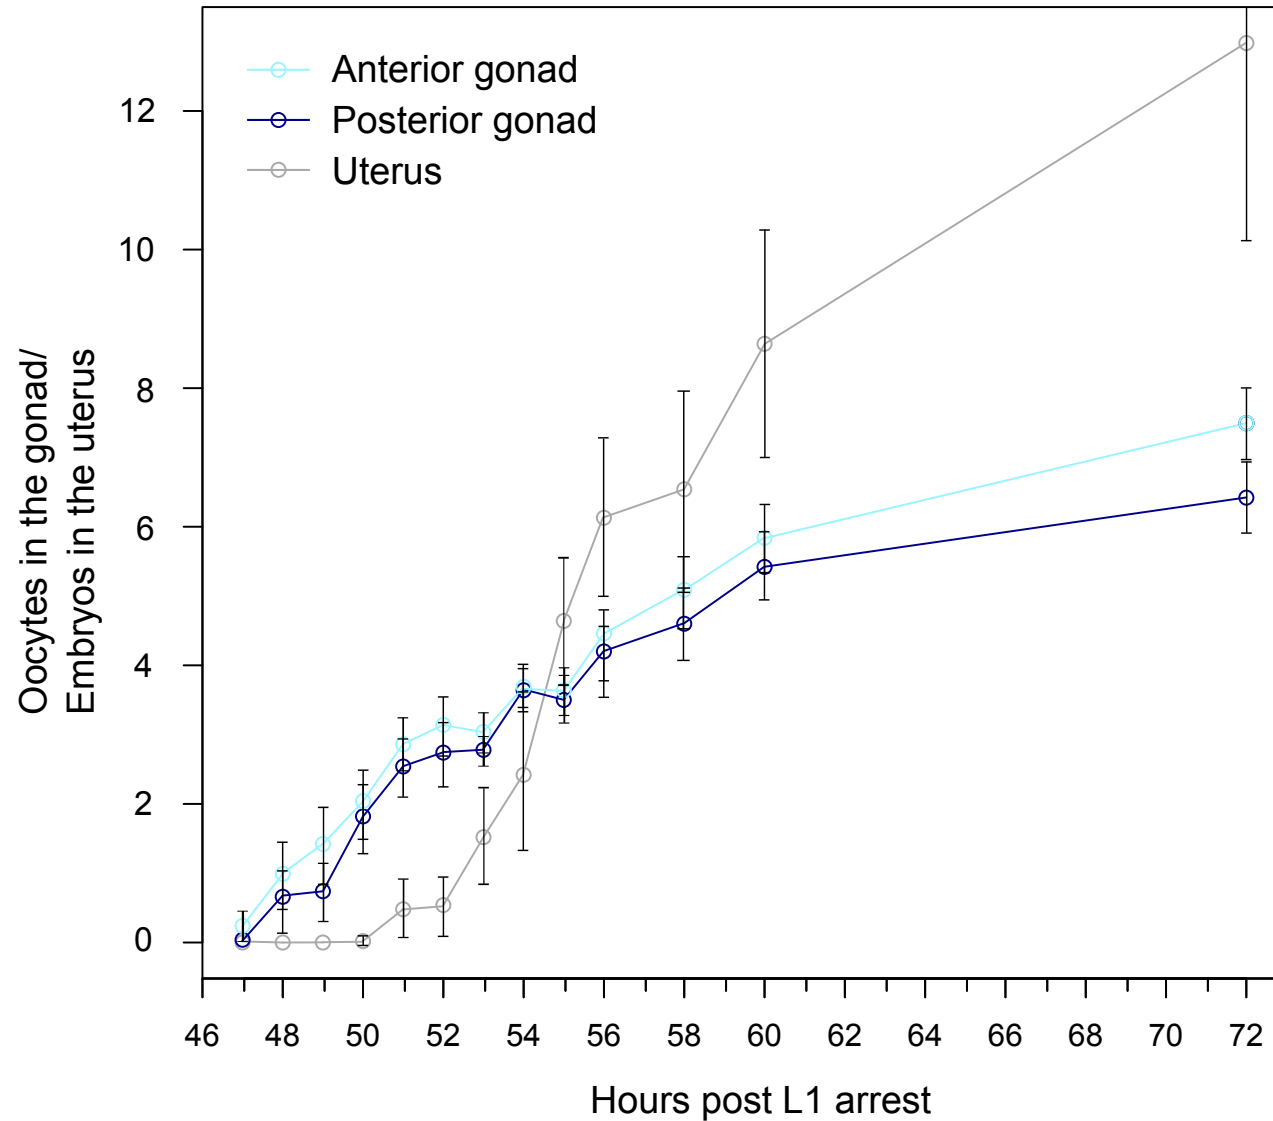

**Figure S4. Census of oocytes in the proximal gonad and embryos in the uterus for worms kept at 20°C.** Oocyte production in the anterior gonad arm precedes production in the posterior arm by about an hour. Error bars are s.d.
