# Supplementary material for: Balanced Trade-Offs between Alternative Strategies Shape the Response of C. elegans Reproduction to Chronic Heat Stress
Source: PLOS journal article supplement (doi:10.1371/journal.pone.0105513), 2014-08-28
Supplement: S6 (10.1371/journal.pone.0105513.s006) [file journal.pone.0105513.s006.pdf › journal.pone.0105513.s006.pdf]

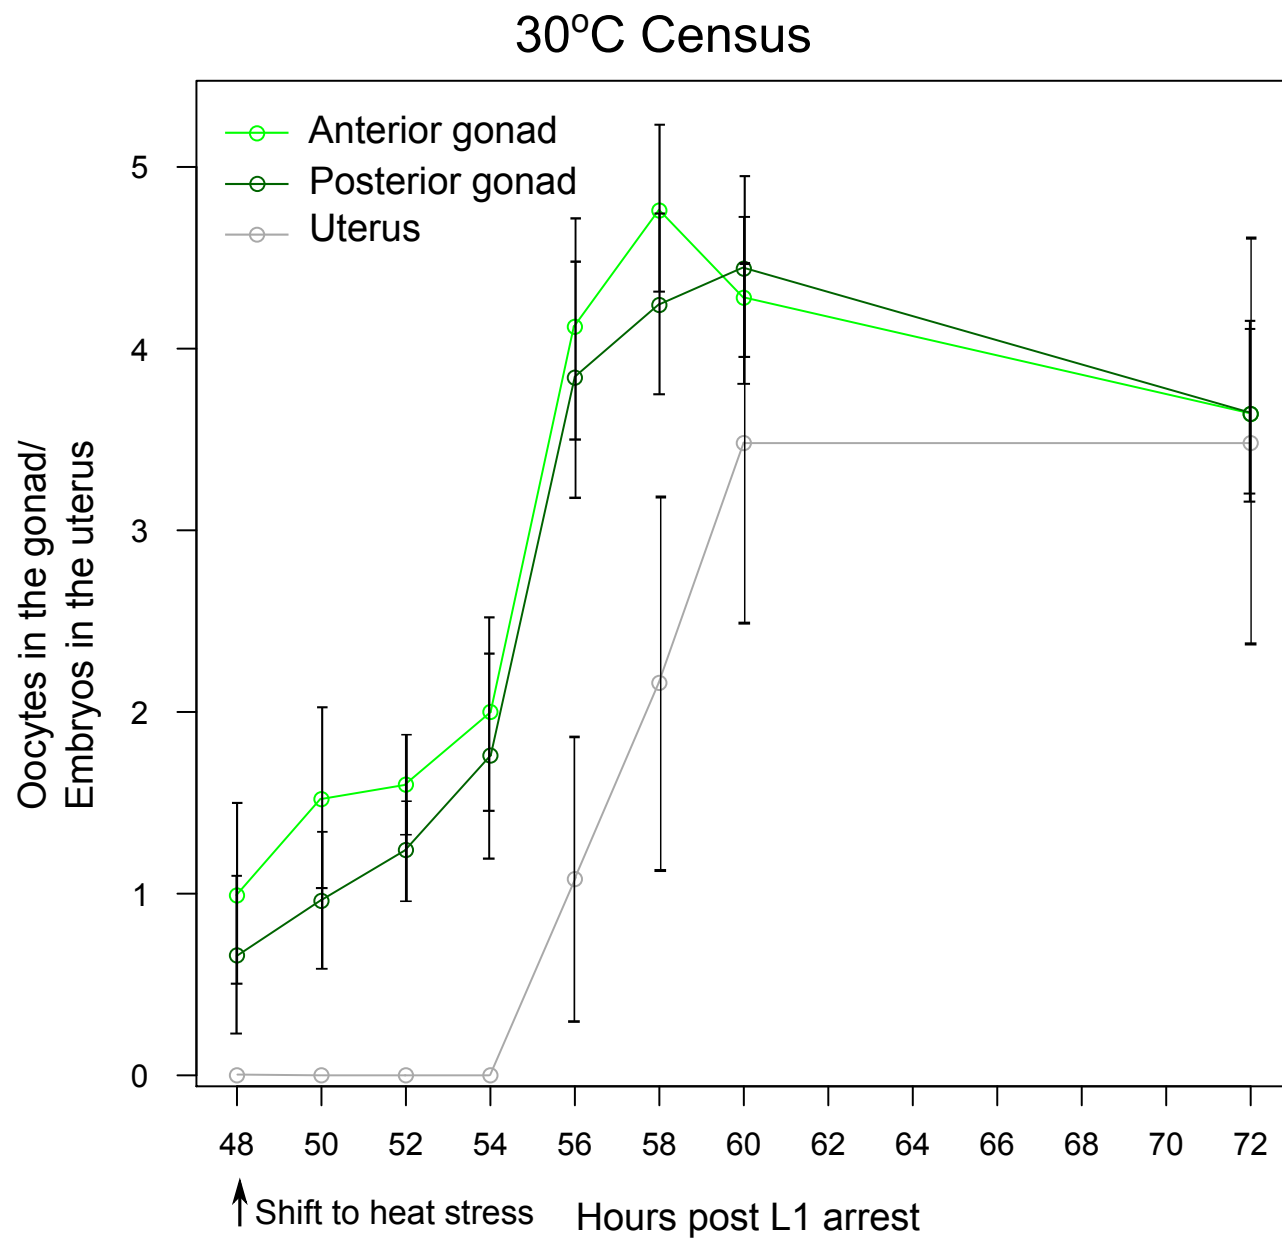

**Figure S6. Census of oocytes in the proximal gonad and embryos in the uterus for worms shifted to 30°C at 48 hours post L1 arrest. Error bars are s.d.**
