# Supplementary material for: Balanced Trade-Offs between Alternative Strategies Shape the Response of C. elegans Reproduction to Chronic Heat Stress
Source: PLOS journal article supplement (doi:10.1371/journal.pone.0105513), 2014-08-28
Supplement: S8 (10.1371/journal.pone.0105513.s008) [file journal.pone.0105513.s008.pdf › journal.pone.0105513.s008.pdf]

## Spermatid transit at 20°C

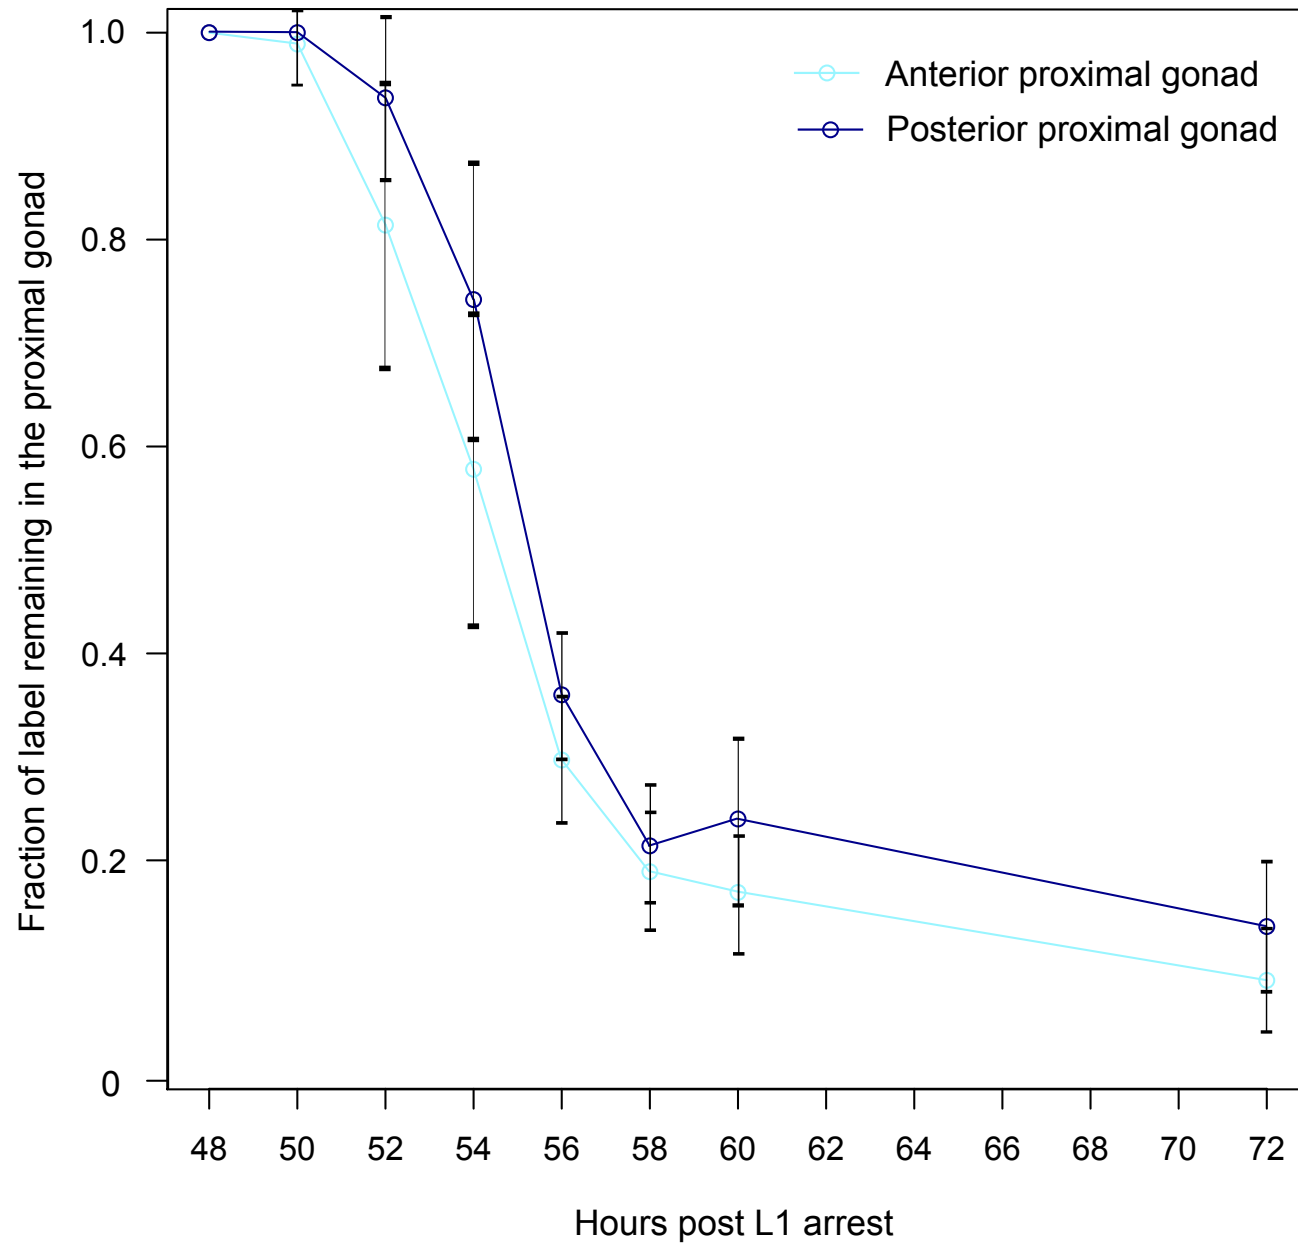

**Figure S8. Spermatid transit at 20°C.** The distribution of the mCherry signal between the three compartments - proximal gonad, spermatheca, and uterus – of both the anterior and posterior gonad arms. Error bars are s.d.
