# Supplementary material for: Balanced Trade-Offs between Alternative Strategies Shape the Response of C. elegans Reproduction to Chronic Heat Stress
Source: PLOS journal article supplement (doi:10.1371/journal.pone.0105513), 2014-08-28
Supplement: S10 (10.1371/journal.pone.0105513.s010) [file journal.pone.0105513.s010.pdf › journal.pone.0105513.s010.pdf]

## Spermatid transit at 29°C

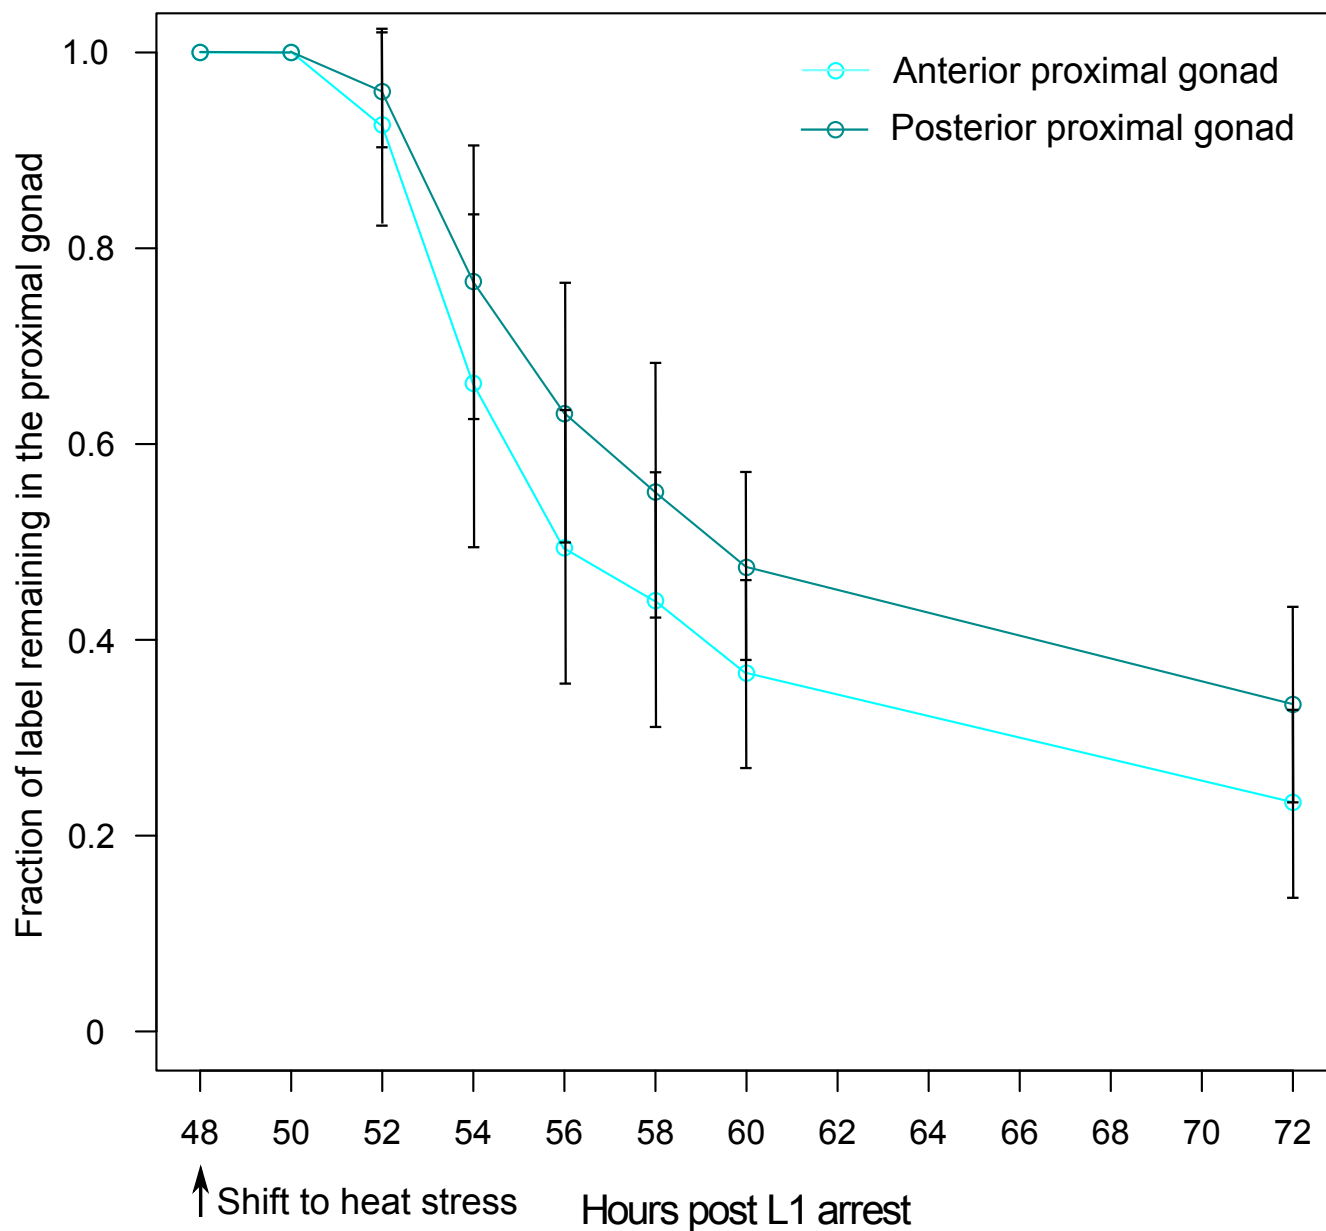

**Figure S10. Spermatid transit for worms shifted to 29°C at 48 hours post L1 arrest.** Error bars are s.d.
