# Supplementary material for: Balanced Trade-Offs between Alternative Strategies Shape the Response of C. elegans Reproduction to Chronic Heat Stress
Source: PLOS journal article supplement (doi:10.1371/journal.pone.0105513), 2014-08-28
Supplement: S11 (10.1371/journal.pone.0105513.s011) [file journal.pone.0105513.s011.pdf › journal.pone.0105513.s011.pdf]

## Spermatid transit at 30°C

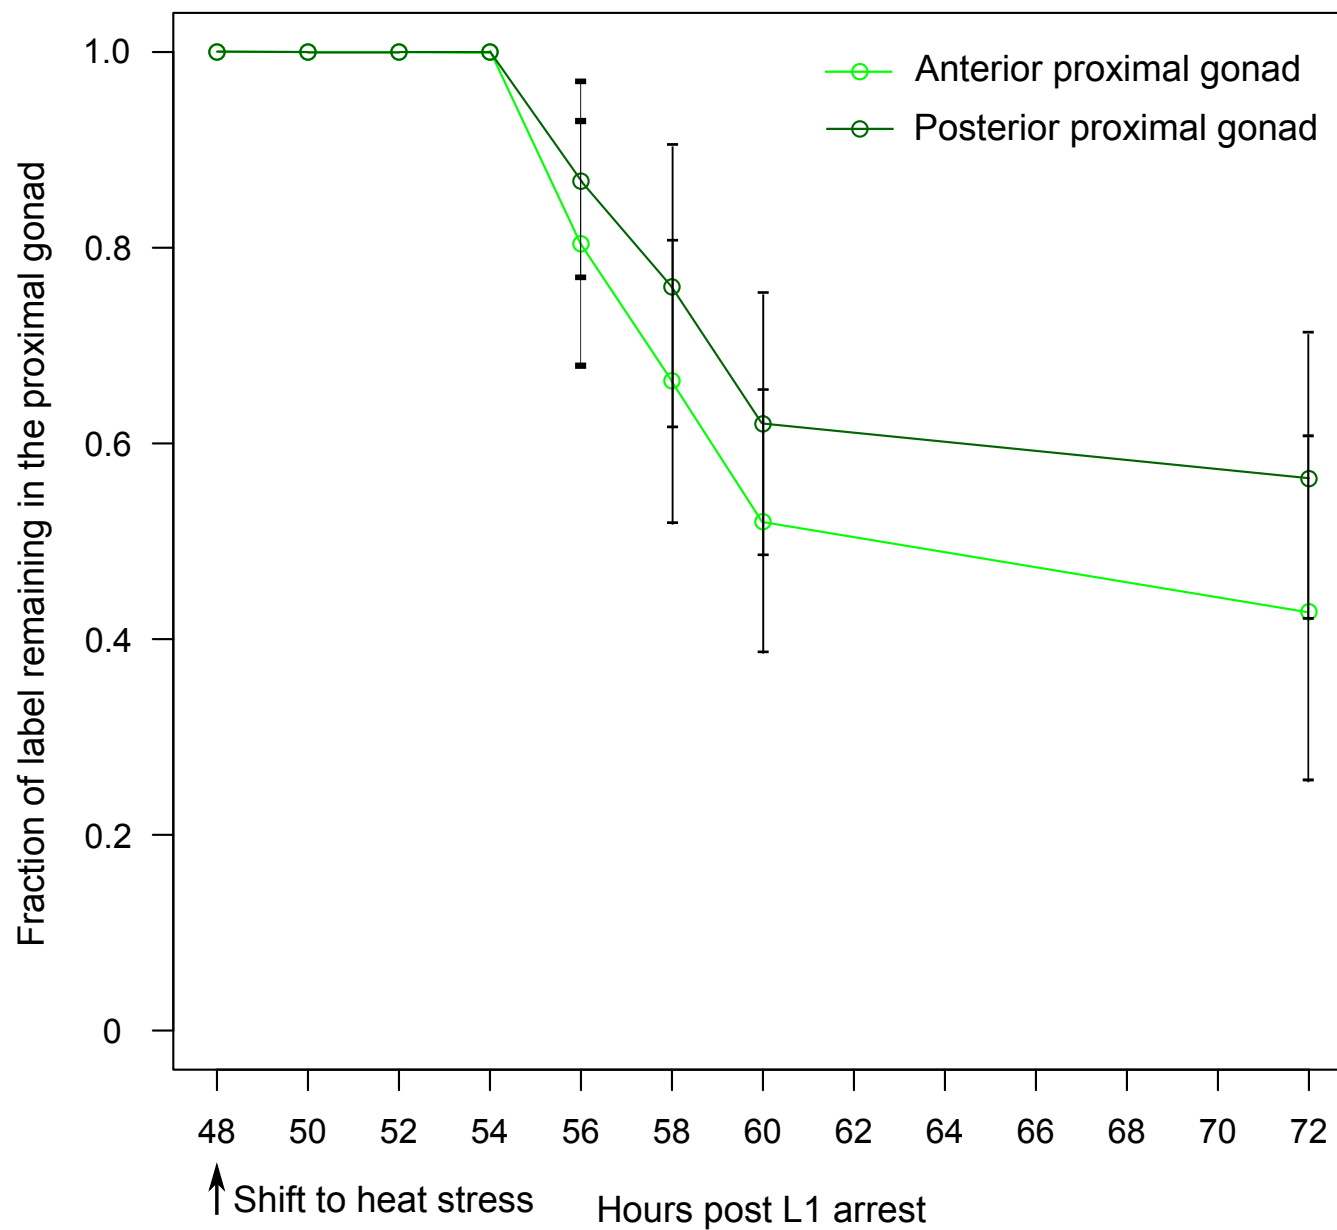

**Figure S11. Spermatid transit for worms shifted to 30°C at 48 hours post L1 arrest.** Error bars are s.d.
