# Supplementary material for: Balanced Trade-Offs between Alternative Strategies Shape the Response of C. elegans Reproduction to Chronic Heat Stress
Source: PLOS journal article supplement (doi:10.1371/journal.pone.0105513), 2014-08-28
Supplement: S12 (10.1371/journal.pone.0105513.s012) [file journal.pone.0105513.s012.pdf › journal.pone.0105513.s012.pdf]

## Spermatid transit at 31°C

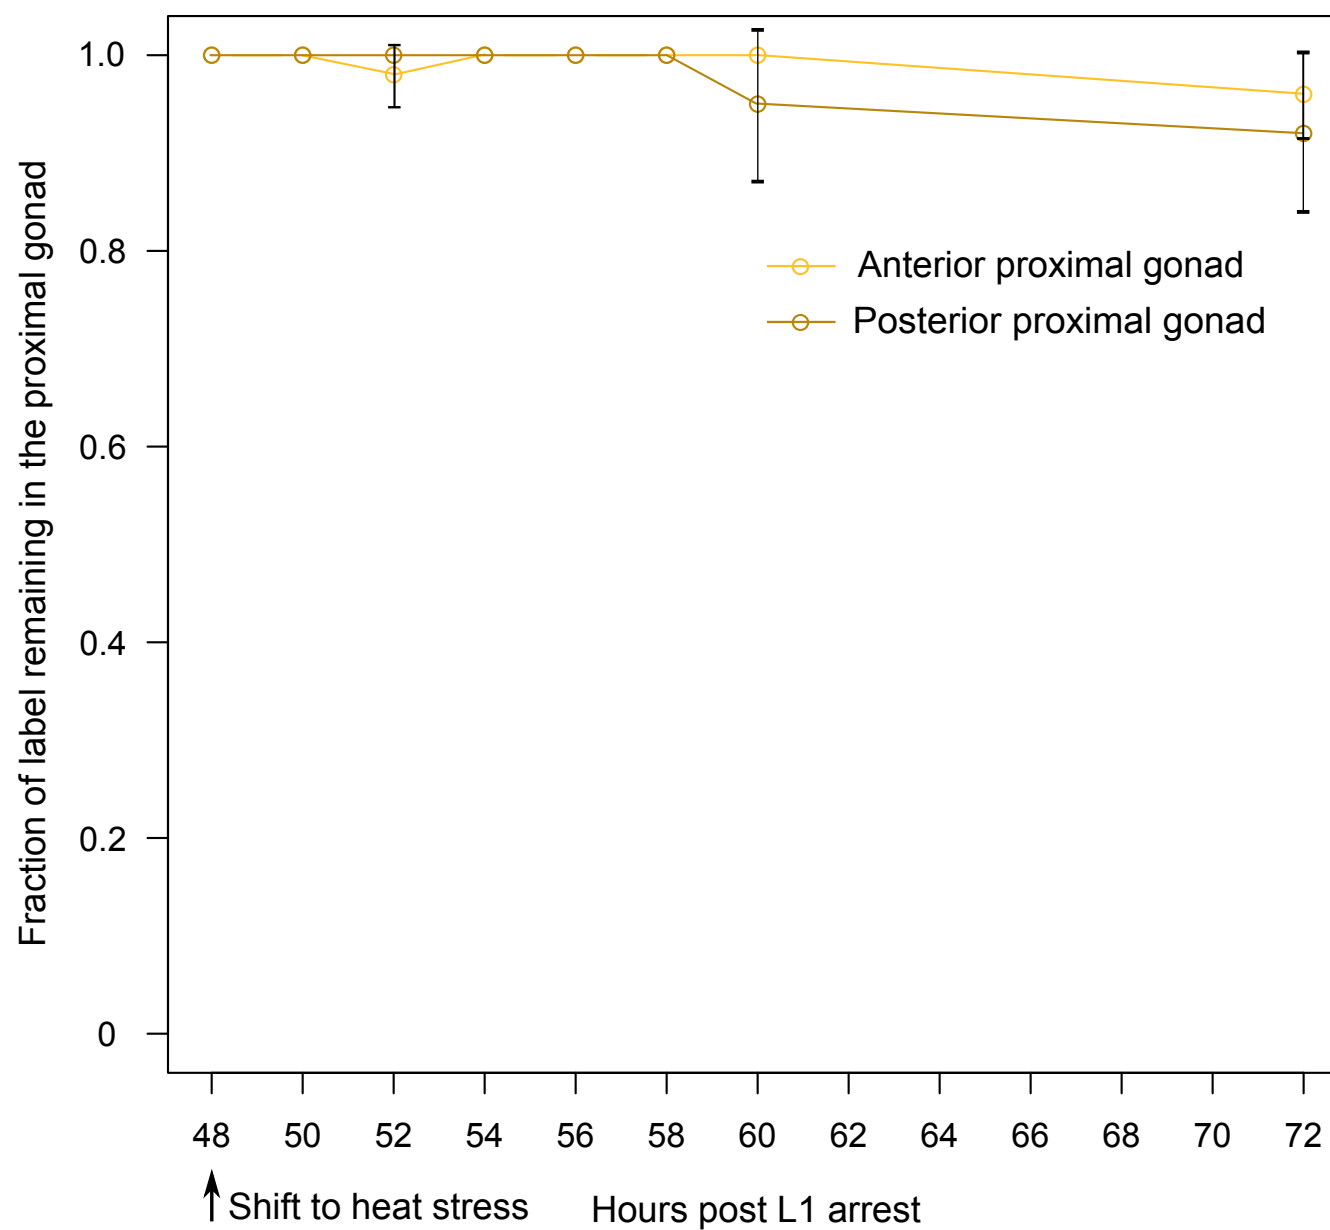

**Figure S12. Spermatid transit for worms shifted to 31°C at 48 hours post L1 arrest.** Error bars are s.d.
