# Supplementary material for: Balanced Trade-Offs between Alternative Strategies Shape the Response of C. elegans Reproduction to Chronic Heat Stress
Source: PLOS journal article supplement (doi:10.1371/journal.pone.0105513), 2014-08-28
Supplement: S13 (10.1371/journal.pone.0105513.s013) [file journal.pone.0105513.s013.pdf › journal.pone.0105513.s013.pdf]

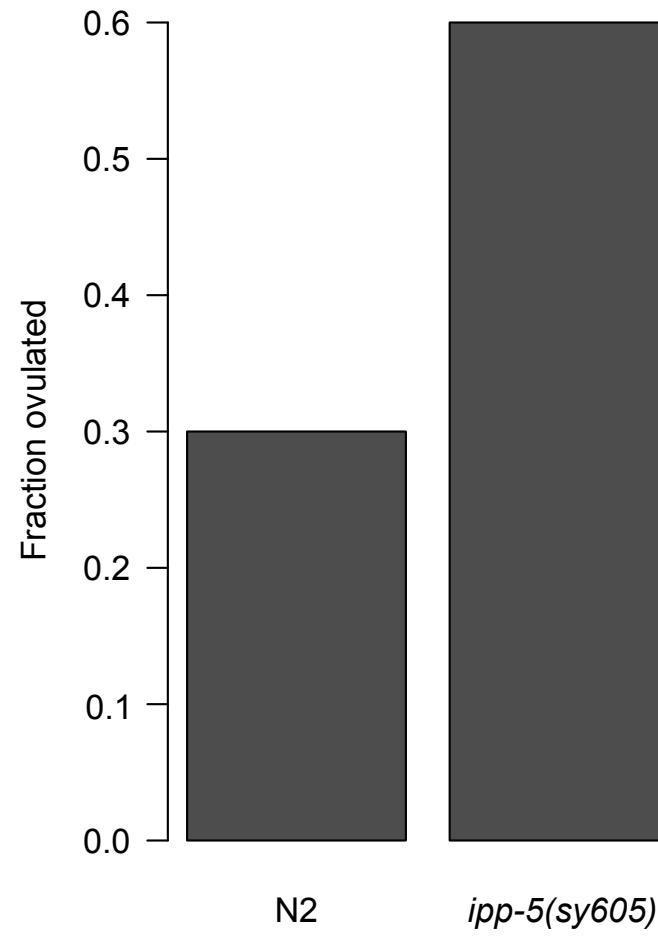

**Figure S13.** Fraction of N2 and *ipp-5(sy605)* worms that ovulated during 24 hours at 31°C.
