# Supplementary material for: Balanced Trade-Offs between Alternative Strategies Shape the Response of C. elegans Reproduction to Chronic Heat Stress
Source: PLOS journal article supplement (doi:10.1371/journal.pone.0105513), 2014-08-28
Supplement: S14 (10.1371/journal.pone.0105513.s014) [file journal.pone.0105513.s014.pdf › journal.pone.0105513.s014.pdf]

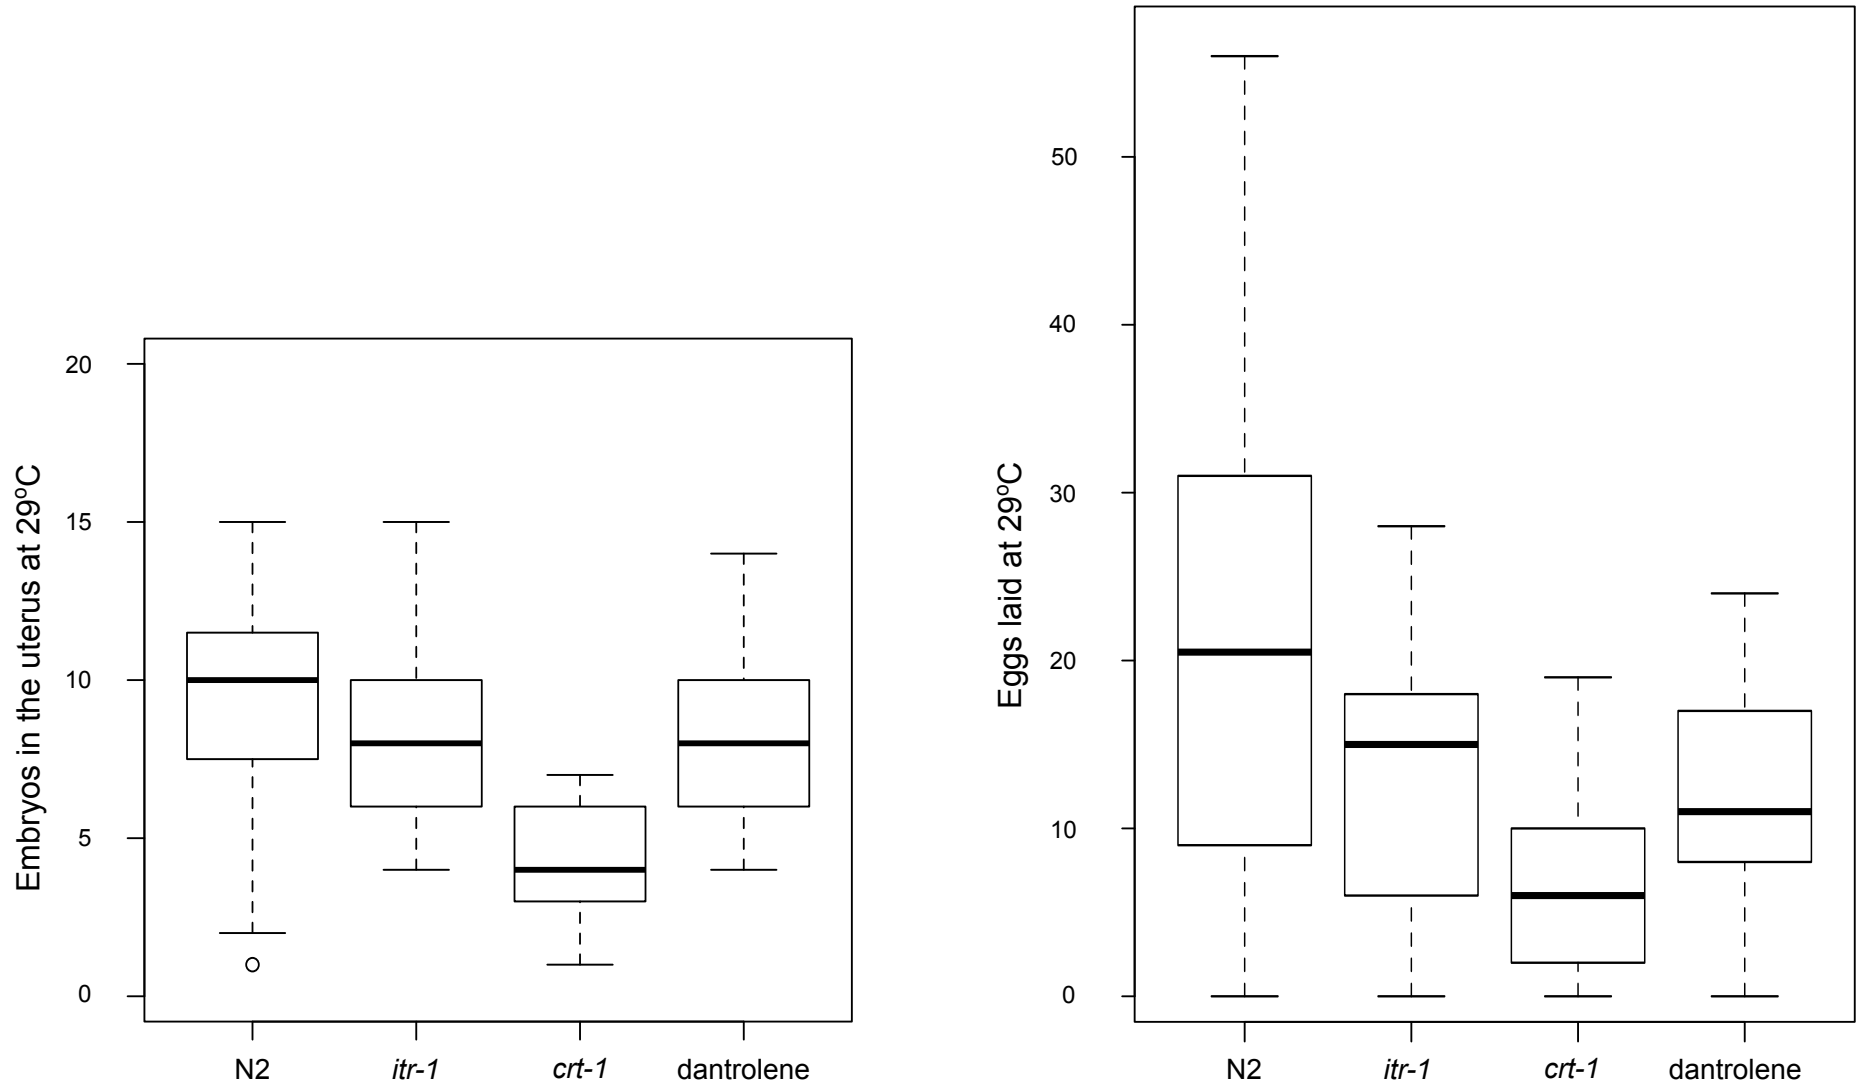

**Figure S14. Ovulation during heat stress (29°C) in wild type and mutant worms.** The average number of embryos in the gonad (left) and eggs laid (right) for N2, *itr-1(gf)*, *crt-1* and N2 raised on 10 uM dantrolene. The total number of ovulations at 29°C can be obtained by adding values in each of these two categories.
