# Supplementary material for: Balanced Trade-Offs between Alternative Strategies Shape the Response of C. elegans Reproduction to Chronic Heat Stress
Source: PLOS journal article supplement (doi:10.1371/journal.pone.0105513), 2014-08-28
Supplement: S16 (10.1371/journal.pone.0105513.s016) [file journal.pone.0105513.s016.pdf › journal.pone.0105513.s016.pdf]

**Table S1. Summary of results on recovery after heat stress.**

| Duration |                    | 28°C | 29°C | 30°C | 30.5°C | 31°C | 31.5°C | 32°C | 33°C |
|----------|--------------------|------|------|------|--------|------|--------|------|------|
| 12 Hours | Fraction recovered | -    | 1.00 | 0.96 | -      | 1.00 | -      | 0.94 | 0.92 |
| 12 Hours | Average Brood size | -    | 41.1 | 19.9 | -      | 44.8 | -      | 17.3 | 3.3  |
| 18 Hours | Fraction recovered | 1.00 | 0.94 | 0.46 | -      | 0.88 | -      | 0.40 | 0.28 |
| 18 Hours | Average brood size | 98.3 | 7.1  | 1.0  | -      | 3.1  | -      | 1.3  | 0.5  |
| 24 Hours | Fraction recovered | 0.88 | 0.12 | 0.10 | 0.10   | 0.58 | 0.32   | 0    | 0    |
| 24 Hours | Average brood size | 2.6  | 0.5  | 0.40 | 0.3    | 1.8  | 0.9    | 0    | 0    |
| 36 Hours | Fraction recovered | -    | 0    | 0    | -      | 0    | -      | 0    | 0    |
| 36 Hours | Average brood size | -    | 0    | 0    | -      | 0    | -      | 0    | 0    |
