# Supplementary material for: Balanced Trade-Offs between Alternative Strategies Shape the Response of C. elegans Reproduction to Chronic Heat Stress
Source: PLOS journal article supplement (doi:10.1371/journal.pone.0105513), 2014-08-28
Supplement: S18 (10.1371/journal.pone.0105513.s018) [file journal.pone.0105513.s018.pdf › journal.pone.0105513.s018.pdf]

**Table S3. Mutants of the inositol 1,4,5-trisphosphate Ca<sup>2+</sup> signaling pathway.**

|                   | Strain           | Genotype                                                                  | Phenotype                                                |
|-------------------|------------------|---------------------------------------------------------------------------|----------------------------------------------------------|
| Used in study     | PS3653           | <i>ipp-5(sy605)</i> X.<br>loss of function                                | Ovulates two oocytes at a time,<br>slightly slow growth  |
|                   | PS2368           | <i>itr-1(sy327) unc-24(e138)</i><br>IV.<br>gain of function               | Slow growth                                              |
|                   | KJ216            | <i>crt-1(jh101)</i> V.<br>loss of function                                | Very slow growth                                         |
|                   | N2 on dantrolene | wild type                                                                 | Slightly slow growth                                     |
| Not used in study | JT73             | <i>itr-1(sa73)</i> IV.<br>loss of function                                | Slow growth,<br>Very low brood size<br>Ovulation defects |
|                   | PS2286           | <i>unc-38(x20) lfe-2(sy326)</i> I.<br>loss of function                    | Ovulation defect shears oocytes                          |
|                   | PS4886           | <i>plc-3(tm1340)/mln1[mls14<br/>dpy-10(e128)]</i> II.<br>loss of function | Ovulation defect shears oocytes                          |
|                   | CB6614           | <i>egl-8(e2917)</i> V.<br>loss of function                                | Low brood size,<br>Impossible to synchronize             |
|                   | MT1083           | <i>egl-8(n488)</i> V.<br>loss of function                                 | Low brood size,<br>Impossible to synchronize             |
