# Supplementary material for: Balanced Trade-Offs between Alternative Strategies Shape the Response of C. elegans Reproduction to Chronic Heat Stress
Source: PLOS journal article supplement (doi:10.1371/journal.pone.0105513), 2014-08-28
Supplement: S19 (10.1371/journal.pone.0105513.s019) [file journal.pone.0105513.s019.pdf › journal.pone.0105513.s019.pdf]

**Table S4. Developmental staging of ovulation mutants.** The age at temperature shift reflects the degree that pleiotropic effects of mutations delayed development compared to wild type.

| Strain           | Average number of oocytes in the gonad | Average number of embryos in the uterus | Hours post hatch at shift |
|------------------|----------------------------------------|-----------------------------------------|---------------------------|
| N2               | 1.65                                   | 0                                       | 48                        |
| N2 on dantrolene | 1.80                                   | 0                                       | 52                        |
| KJ216            | 1.52                                   | 0.04                                    | 72                        |
| PS2286           | 1.52                                   | 0                                       | 51                        |
| PS2368           | 2.21                                   | 0.04                                    | 60                        |
| PS3653           | 1.60                                   | 0                                       | 52                        |
