# Supplementary material for: Balanced Trade-Offs between Alternative Strategies Shape the Response of C. elegans Reproduction to Chronic Heat Stress
Source: PLOS journal article supplement (doi:10.1371/journal.pone.0105513), 2014-08-28
Supplement: S20 (10.1371/journal.pone.0105513.s020) [file journal.pone.0105513.s020.pdf › journal.pone.0105513.s020.pdf]

**Table S5. Timeline for a 24 hour heat stress experiment.**

|                      | Day | Worm preparation                                                                                                           | Media preparation                                       |
|----------------------|-----|----------------------------------------------------------------------------------------------------------------------------|---------------------------------------------------------|
|                      | 1   | Chunk four plates with worms.                                                                                              | Pour NGM plates.                                        |
|                      | 2   |                                                                                                                            | 5:00pm Inoculate fresh overnight culture of OP50.       |
|                      | 3   | 4:00pm Prepare synchronized culture of N2.                                                                                 | 5:00pm Seed six lawn plates with OP50.                  |
|                      | 4   | 10:00am Plate synchronized culture onto lawn plates. Incubate at 20°C.                                                     |                                                         |
|                      | 5   |                                                                                                                            | 5:00pm Seed 50 plates with 5uL 1:1000 dilution of OP50. |
|                      | 6   | 9:00am Single and stage N2<br>10:00 am Shift to heat stress temperature. Reset recording thermometer.                      |                                                         |
| 24 hours heat stress | 7   | 10:00am Shift worms back to 20°C.<br>Record minimum and maximum temperatures.<br>Count number of eggs laid at temperature. |                                                         |
| 24 hours recovery    | 8   | Count eggs on plate.                                                                                                       |                                                         |
| 48 hours recovery    | 9   | Count larvae on plate.                                                                                                     |                                                         |
| 72 hours recovery    | 10  | Count larvae on plate.                                                                                                     |                                                         |
| 96 hours recovery    | 11  | Count larvae on plate.                                                                                                     |                                                         |
| 120 hours recovery   | 12  | Count larvae on plate.                                                                                                     |                                                         |
